# Supplementary material for: Ni3S2/MxSy–NiCo LDH (M = Cu, Fe, V, Ce, Bi) heterostructure nanosheet arrays on Ni foam as high-efficiency electrocatalyst for electrocatalytic overall water splitting and urea splitting
Source: Royal Society of Chemistry journal article supplement (doi:10.1039/d2dt03047k), 2022-12-14
Supplement: d2dt03047k1.pdf [file d2dt03047k1.pdf]

## **Ni<sub>3</sub>S<sub>2</sub>/M<sub>x</sub>S<sub>y</sub>-NiCo LDH (M = Cu, Fe, V, Ce, Bi) heterostructure nanosheet arrays on Ni foam as high-efficiency electrocatalyst boosting for electrocatalytic overall water splitting and urea splitting**

Chenyi Zhang<sup>a</sup>, Xiaoqiang Du<sup>a\*</sup>, Xiaoshuang Zhang<sup>b</sup> and Yanhong Wang<sup>a</sup>

<sup>a</sup>School of Chemical Engineering and Technology, North University of China, Xueyuan road 3, Taiyuan 030051, People's Republic of China. E-mail: duxq16@nuc.edu.cn

<sup>b</sup>School of Science, North University of China, Xueyuan road 3, Taiyuan 030051, People's Republic of China.

### **DFT computation details:**

The DFT calculations were performed using the Cambridge Sequential Total Energy Package (CASTEP) with the plane-wave pseudo-potential method. The geometrical structures of the (003) plane of Ni(OH)<sub>2</sub>, the (003) plane of Ni<sub>3</sub>S<sub>2</sub> and the (002) plane of CuS was optimized by the generalized gradient approximation (GGA) methods. The Revised Perdew-Burke-Ernzerh of (RPBE) functional was used to treat the electron exchange correlation interactions. A Monkhorst Pack grid k-points of 5\*5\*1 of Co-Ni(OH)<sub>2</sub>, CuS and Ni<sub>3</sub>S<sub>2</sub>, a plane-wave basis set cut-off energy of 500 eV were used for integration of the Brillouin zone. The structures were optimized for energy and force convergence set at 0.05 eV/Å and 2.0×10<sup>-5</sup> eV, respectively.

## **Experiment section**

### **Materials Characterization**

The XRD patterns were reported from a Philips 1130 X-ray diffractometer (40 kV, 30 mA, Cu KR radiation, λ=1.5418 Å). The morphology of the Ni<sub>3</sub>S<sub>2</sub>/CuS-NiCo LDH/NF, Ni<sub>3</sub>S<sub>2</sub>/FeS-NiCo LDH/NF, Ni<sub>3</sub>S<sub>2</sub>/VS-NiCo LDH/NF, Ni<sub>3</sub>S<sub>2</sub>/CeS-NiCo LDH/NF and Ni<sub>3</sub>S<sub>2</sub>/Bi<sub>2</sub>S<sub>3</sub>-NiCo LDH/NF material is characterized by SEM images (Hitachi S-4800). TEM and HRTEM images were performed on a JEM-2100 with an accelerating voltage of 200 kV. The chemical composition and elemental states were analyzed by X-ray photoelectron spectroscopy (XPS, Axis Ultra DLD) using 60 W monochromated Mg Kα radiations as the exciting source.

## Electrochemical measurements

Electrocatalytic tests were done with a CHI 760E electrochemical workstation (CH Instruments, Inc., Shanghai) in a typical three-electrode device. The resulting self-supported  $\text{Ni}_3\text{S}_2/\text{CuS-NiCo LDH/NF}$ ,  $\text{Ni}_3\text{S}_2/\text{FeS-NiCo LDH/NF}$ ,  $\text{Ni}_3\text{S}_2/\text{VS-NiCo LDH/NF}$ ,  $\text{Ni}_3\text{S}_2/\text{CeS-NiCo LDH/NF}$  and  $\text{Ni}_3\text{S}_2/\text{Bi}_2\text{S}_3\text{-NiCo LDH/NF}$  electrodes were directly utilized as working electrode, a graphite rod and Ag/AgCl as counter electrode and reference electrode, respectively. All measured potentials in this work were calibrated to RHE according to the following equation:  $E(\text{RHE}) = E(\text{Ag/AgCl}) + (0.197 + 0.059 \times \text{pH})$ . Linear sweep voltammetry polarization curves were performed in 1 M KOH solution at a scan rate of  $5 \text{ mV s}^{-1}$ . Electrochemical impedance spectra (EIS) were collected at a frequency between 100 kHz and 0.01 Hz. In water splitting tests, all results were revised by ohmic potentials drop ( $iR$ ) correction. The electrolyte for OER measurements was 1 M KOH, whereas the UOR performances were evaluated in 1 M KOH with 0.5 M urea. The stability measurements were recorded by chronopotentiometry measurements.

The faradaic efficiency (FE) was calculated by comparing the experimentally measured gas volume with the theoretically calculated value by a classic gas chromatographic method.

Through the collected gas amounts compared with the theoretically calculated values, the FE has been calculated as 88% by the follow equations of (1):

$$FE = (n \times z \times F) / I \times t \quad (1)$$

in which,  $n$  is the actual moles number of products (the value can be evaluated by the collected gas amounts),  $z$  is the reaction electron number (the value is 6 as for 1 mol  $\text{N}_2$ ),  $F$  is Faraday constant ( $96485 \text{ C mol}^{-1}$ ),  $I$  is the current (A),  $t$  is the test time (s)."

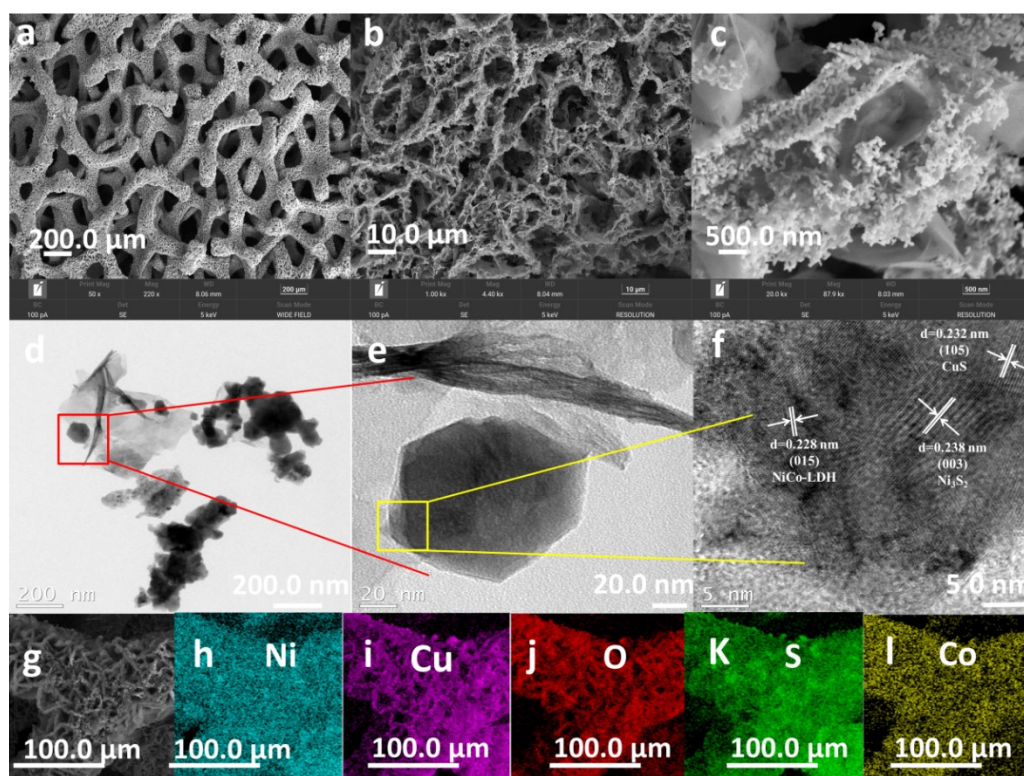

**Fig. S1** (a–c) Typical SEM images of the  $\text{Ni}_3\text{S}_2/\text{CuS-NiCo}$  LDH on Ni foam; (d) TEM image of the  $\text{Ni}_3\text{S}_2/\text{CuS-NiCo}$  LDH/NF; (e) enlarged TEM image of the  $\text{Ni}_3\text{S}_2/\text{CuS-NiCo}$  LDH/NF; (f) HRTEM image of the  $\text{Ni}_3\text{S}_2/\text{CuS-NiCo}$  LDH/NF nanosheets; (g–k) EDX element mapping of Ni, Cu, O, S, and Co.

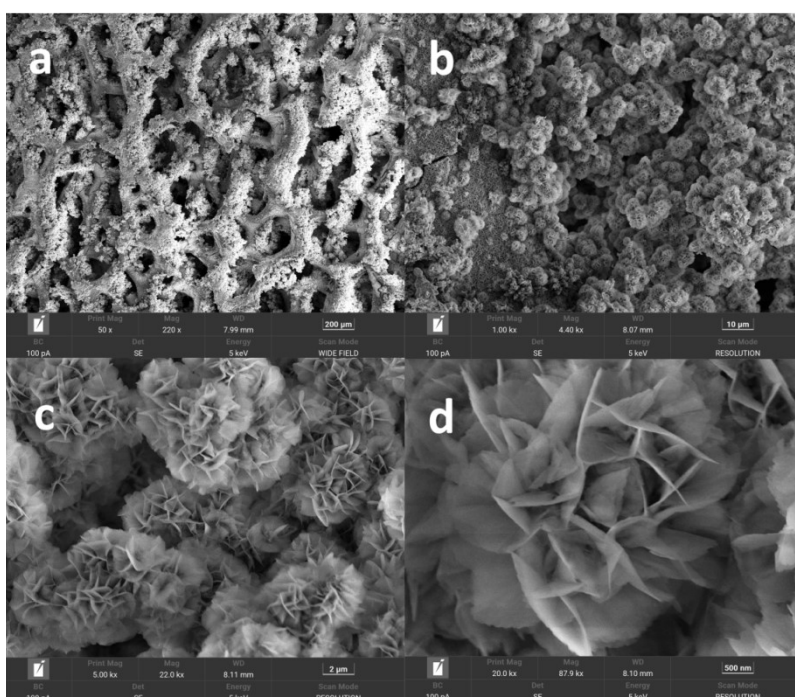

**Fig. S2** (a–d) Typical SEM images of the  $\text{Ni}_3\text{S}_2/\text{FeS-NiCo}$  LDH on Ni foam.

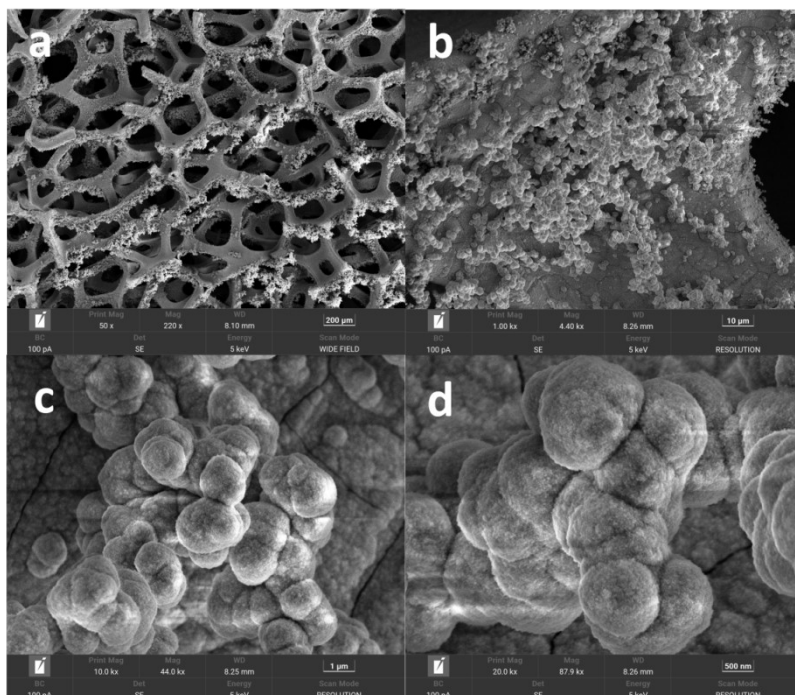

**Fig. S3** (a–d) Typical SEM images of the  $\text{Ni}_3\text{S}_2/\text{VS-NiCo}$  LDH on Ni foam.

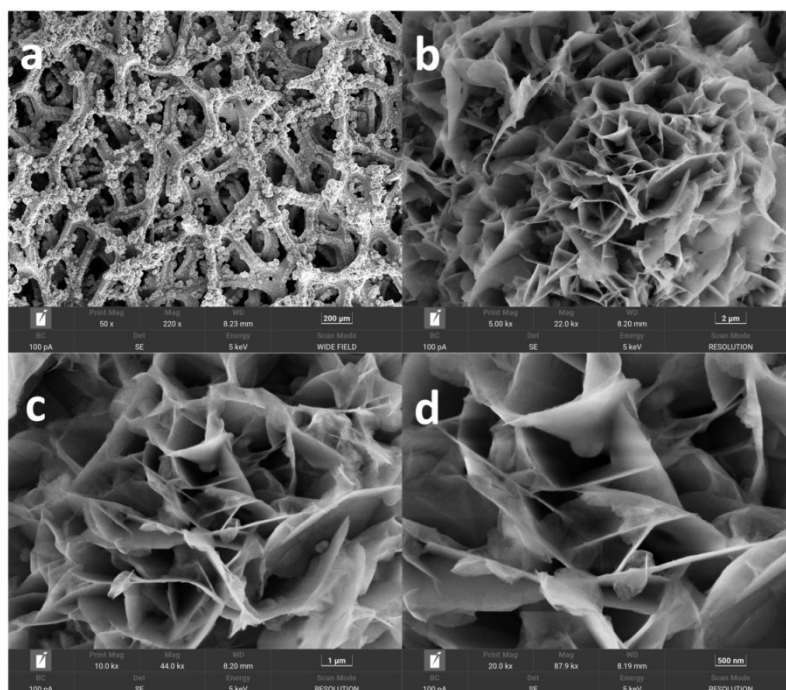

**Fig. S4** (a–d) Typical SEM images of the  $\text{Ni}_3\text{S}_2/\text{CeS-NiCo}$  LDH on Ni foam.

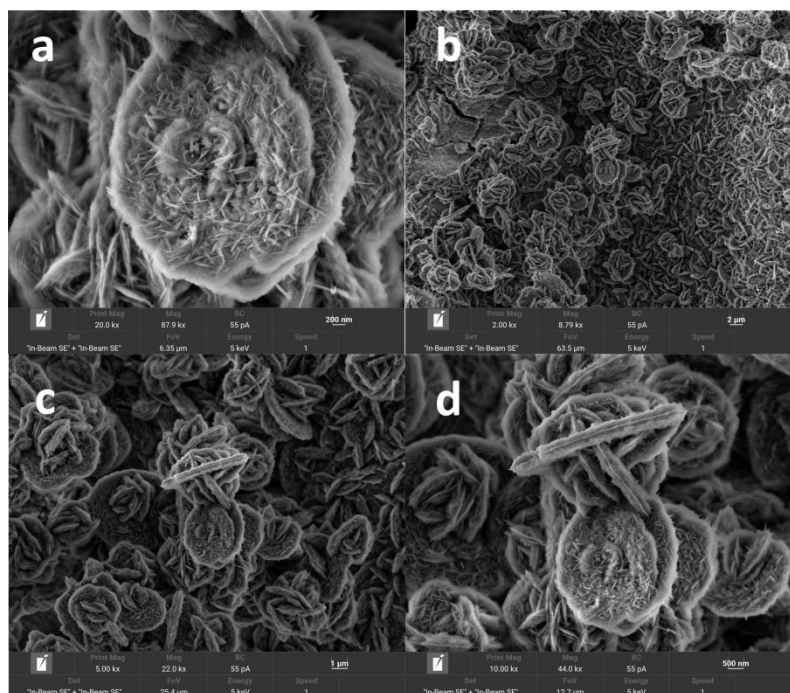

**Fig. S5** (a–d) Typical SEM images of the NiCo LDH on Ni foam.

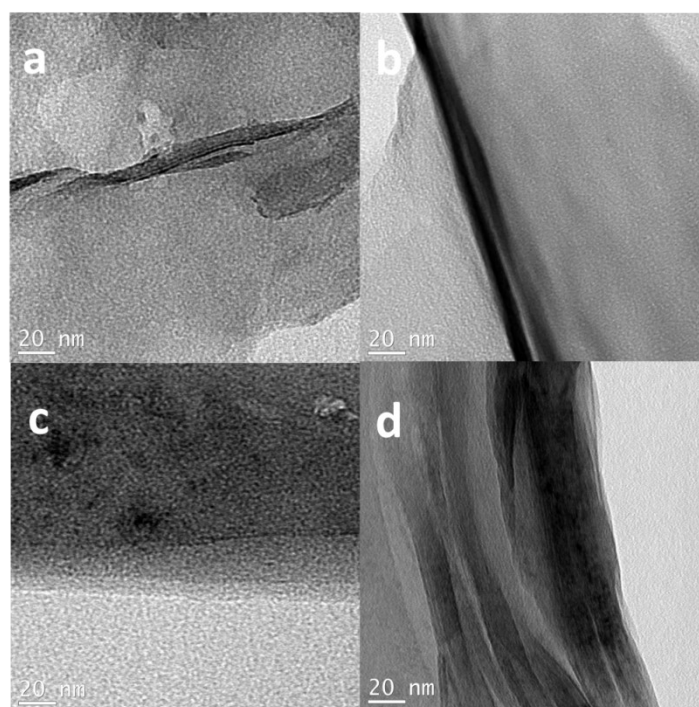

**Fig. S6** (a–d) enlarged TEM image of the NS/BS-NC LDH.

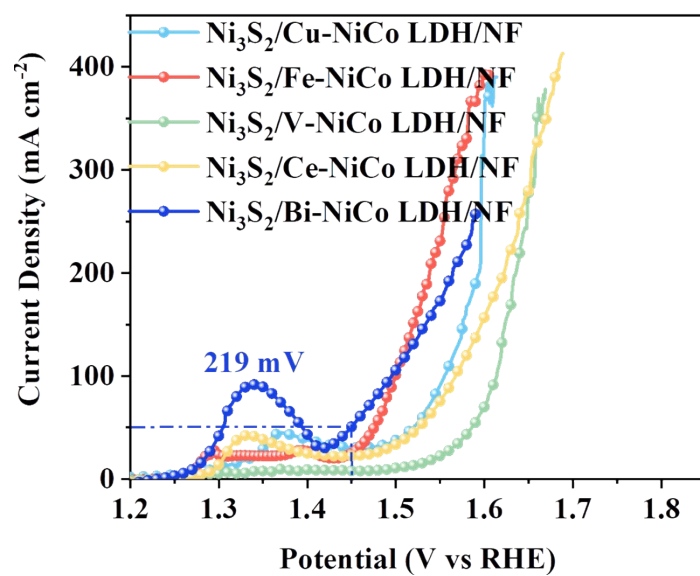

**Fig. S7** LSV of  $\text{Ni}_3\text{S}_2/\text{M}_x\text{S}_y\text{-NiCo LDH/NF}$  with a scan rate of 5 mV/s in a 1 M KOH solution.

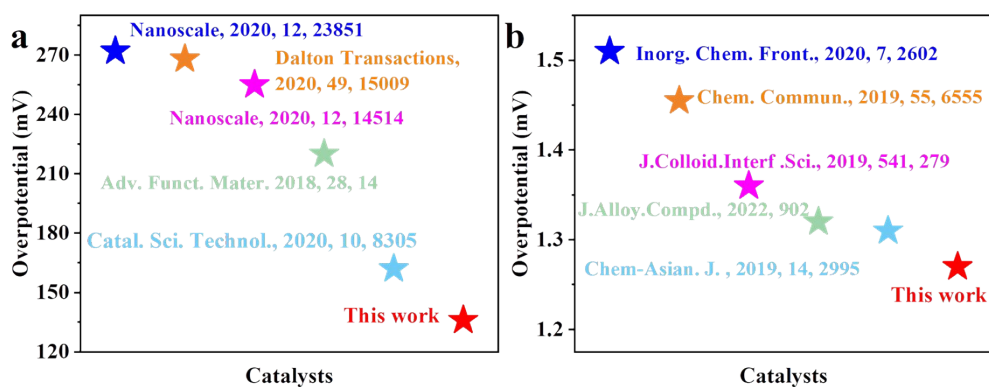

**Fig. S8** Comparison of overpotentials of (a) OER [1-5] and (b) UOR [6-10].

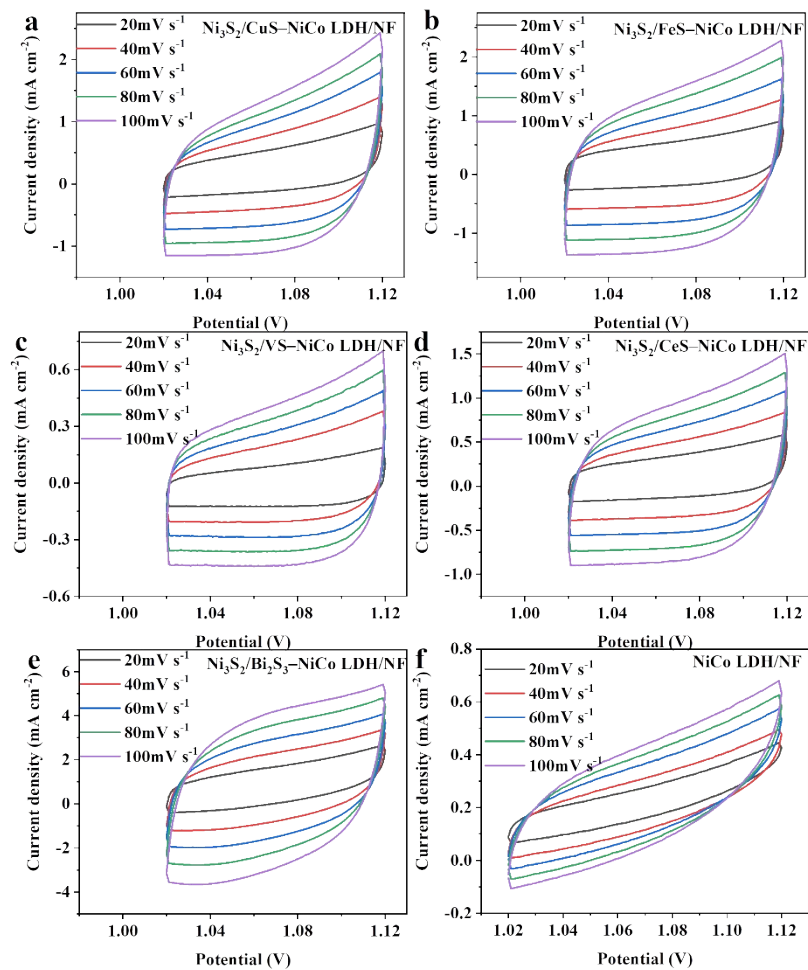

**Fig. S9** In 1.0 M KOH, OER cyclic voltammograms of a)  $\text{Ni}_3\text{S}_2/\text{CuS-NiCo LDH/NF}$ , b)  $\text{Ni}_3\text{S}_2/\text{FeS-NiCo LDH/NF}$ , c)  $\text{Ni}_3\text{S}_2/\text{VS-NiCo LDH/NF}$  d)  $\text{Ni}_3\text{S}_2/\text{CeS-NiCo LDH/NF}$  and e)  $\text{Ni}_3\text{S}_2/\text{Bi}_2\text{S}_3\text{-NiCo LDH/NF}$  at the different scan rates varying from 20 to  $100 \text{ mV} \cdot \text{s}^{-1}$ .

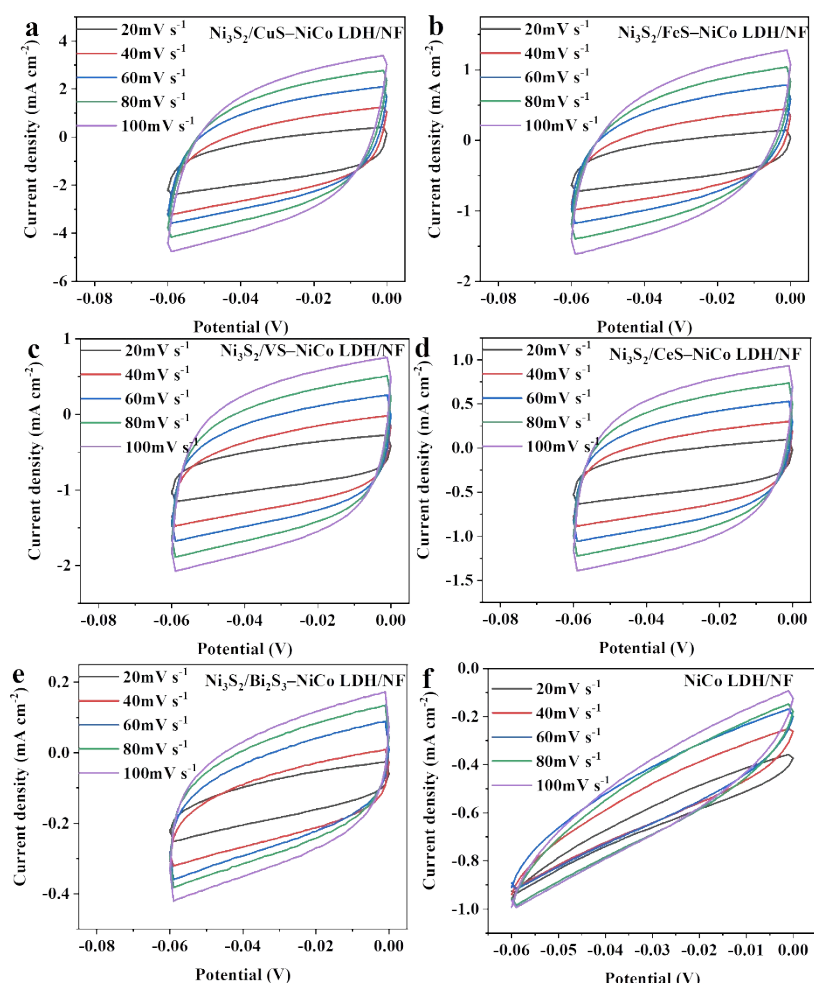

**Fig. S10** In 1.0 M KOH, HER cyclic voltammograms of a) Ni<sub>3</sub>S<sub>2</sub>/CuS-NiCo LDH/NF, b) Ni<sub>3</sub>S<sub>2</sub>/FeS-NiCo LDH/NF, c) Ni<sub>3</sub>S<sub>2</sub>/VS-NiCo LDH/NF d) Ni<sub>3</sub>S<sub>2</sub>/CeS-NiCo LDH/NF and e) Ni<sub>3</sub>S<sub>2</sub>/Bi<sub>2</sub>S<sub>3</sub>-NiCo LDH/NF at the different scan rates varying from 20 to 100 mV·s<sup>-1</sup>.

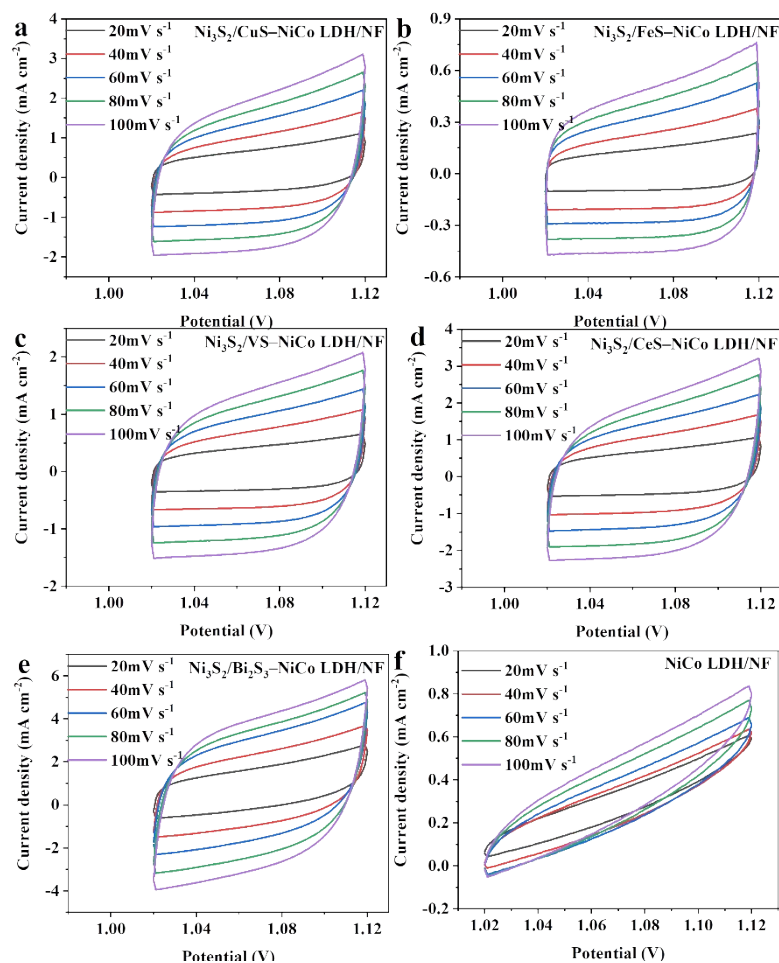

**Fig. S11** In 1.0 M KOH with 0.5 M urea, UOR cyclic voltammograms of a)  $\text{Ni}_3\text{S}_2/\text{CuS-NiCo}$  LDH/NF, b)  $\text{Ni}_3\text{S}_2/\text{FeS-NiCo}$  LDH/NF, c)  $\text{Ni}_3\text{S}_2/\text{VS-NiCo}$  LDH/NF d)  $\text{Ni}_3\text{S}_2/\text{CeS-NiCo}$  LDH/NF and e)  $\text{Ni}_3\text{S}_2/\text{Bi}_2\text{S}_3\text{-NiCo}$  LDH/NF at the different scan rates varying from 20 to 100  $\text{mV}\cdot\text{s}^{-1}$ .

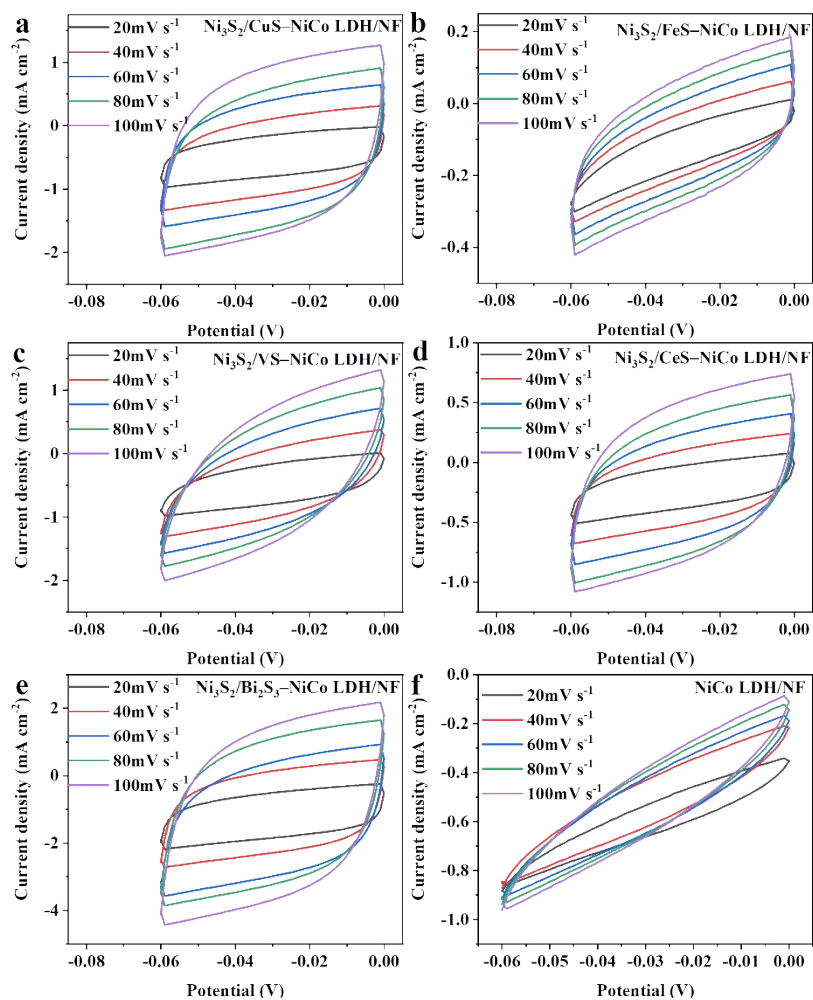

**Fig. S12** In 1.0 M KOH with 0.5 M urea, HER cyclic voltammograms of a)  $\text{Ni}_3\text{S}_2/\text{CuS-NiCo LDH/NF}$ , b)  $\text{Ni}_3\text{S}_2/\text{FeS-NiCo LDH/NF}$ , c)  $\text{Ni}_3\text{S}_2/\text{VS-NiCo LDH/NF}$  d)  $\text{Ni}_3\text{S}_2/\text{CeS-NiCo LDH/NF}$  and e)  $\text{Ni}_3\text{S}_2/\text{Bi}_2\text{S}_3\text{-NiCo LDH/NF}$  at the different scan rates varying from 20 to  $100 \text{ mV} \cdot \text{s}^{-1}$ .

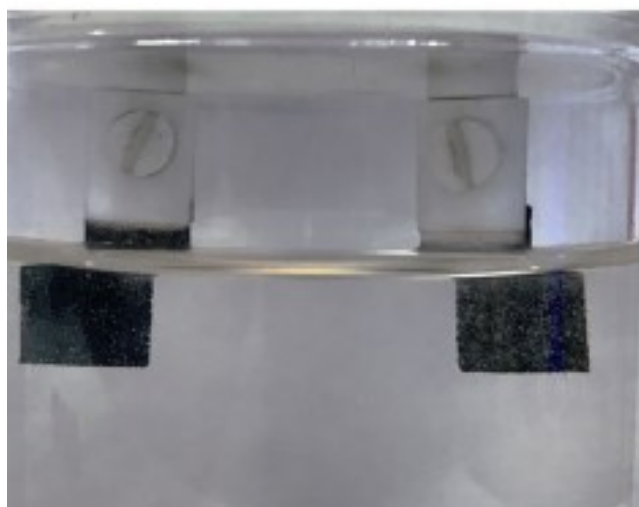

**Fig. S13** The physical image of  $\text{H}_2$  and  $\text{O}_2$ .

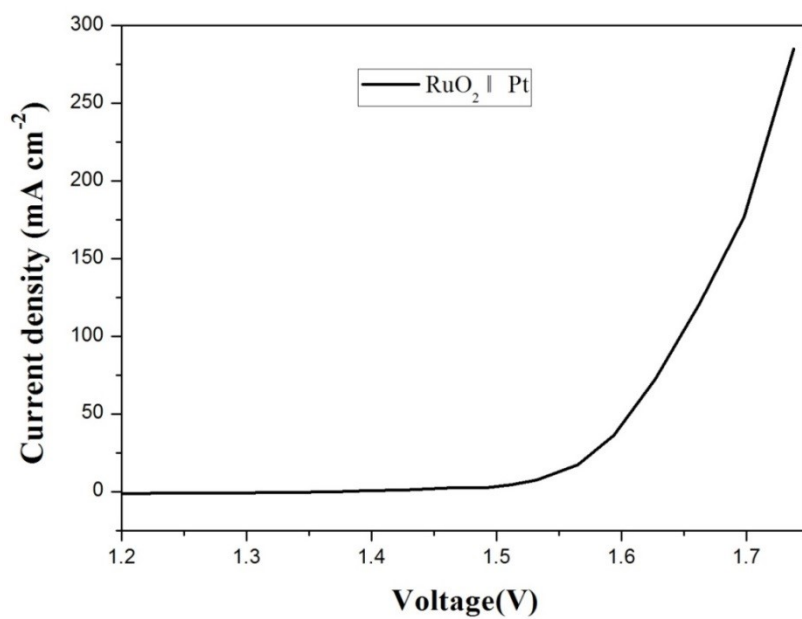

**Fig. S14** Polarization curve of the RuO<sub>2</sub> and Pt for water splitting with a scan rate of 5 mV s<sup>-1</sup> in 1 M KOH.

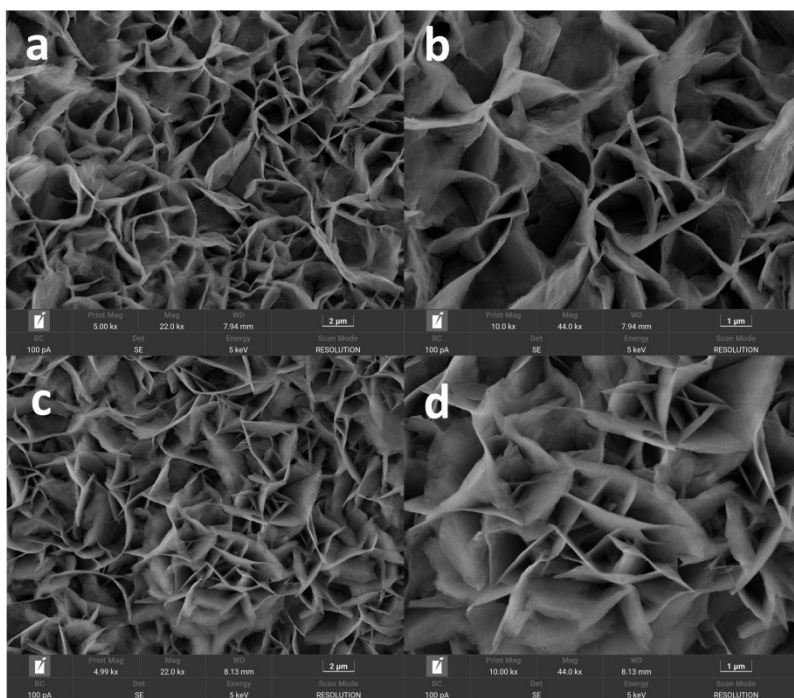

**Fig. S15** SEM of Ni<sub>3</sub>S<sub>2</sub>/Bi<sub>2</sub>S<sub>3</sub>-NiCo LDH/NF after 12 h for (a-b) OER and (c-d) UOR.

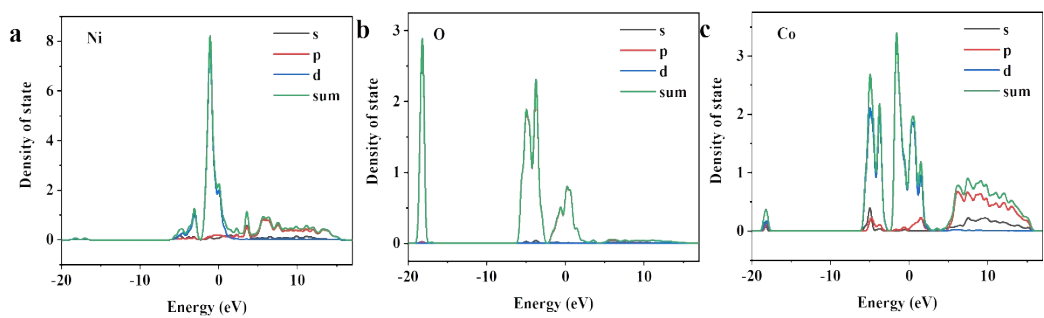

**Fig.S16** Density of states for the Co-Ni(OH)<sub>2</sub>, (a) Ni, (b) O and (c) Co.

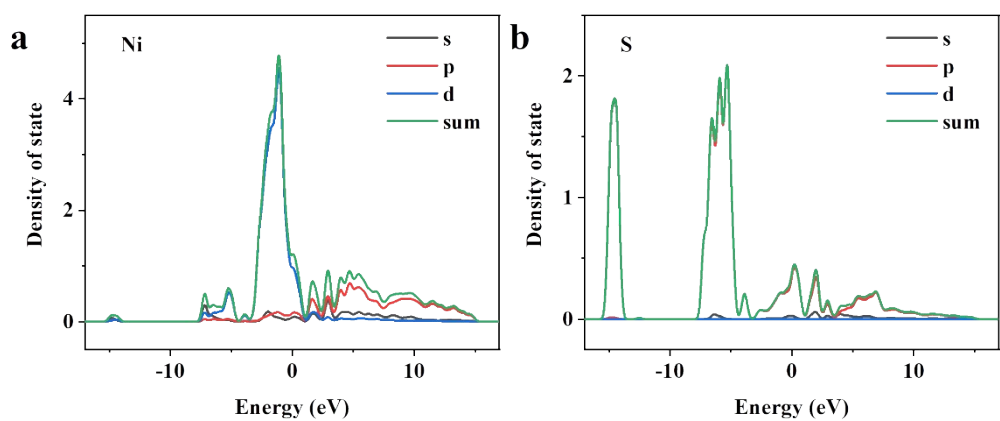

**Fig.S17** Density of states for the Ni<sub>3</sub>S<sub>2</sub>, (a) Ni and (b) S.

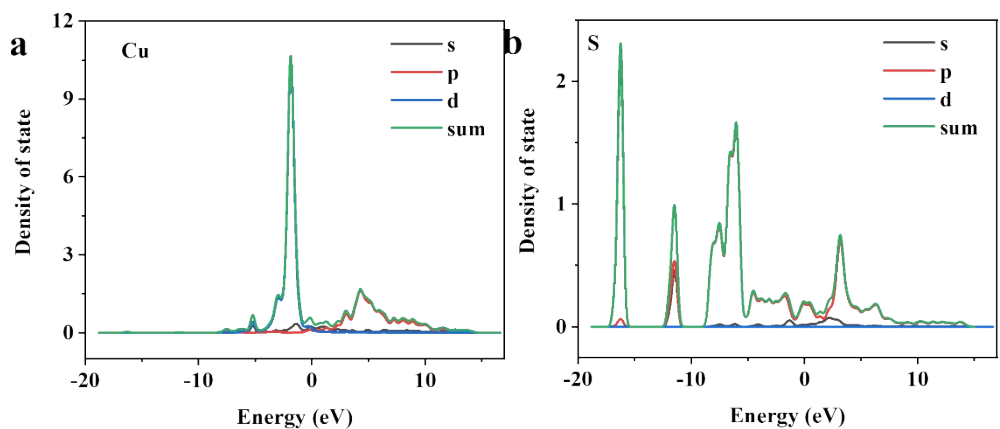

**Fig.S18** Density of states for the CuS, (a) Cu and (b) S.

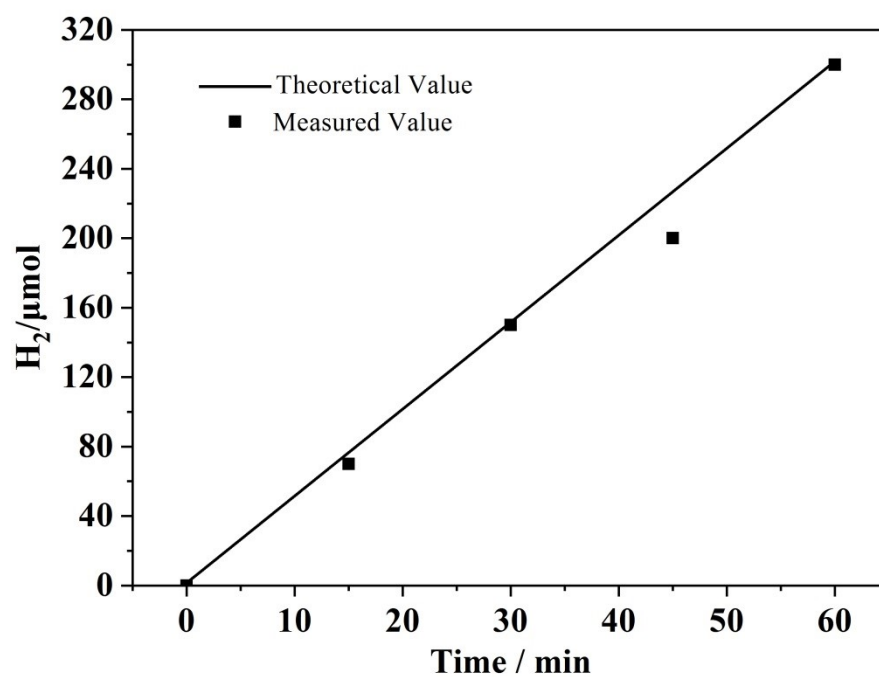

**Fig. S19** Electrocatalytic efficiency of H<sub>2</sub> production over Ni<sub>3</sub>S<sub>2</sub>/Bi<sub>2</sub>S<sub>3</sub>-NiCo LDH/NF.

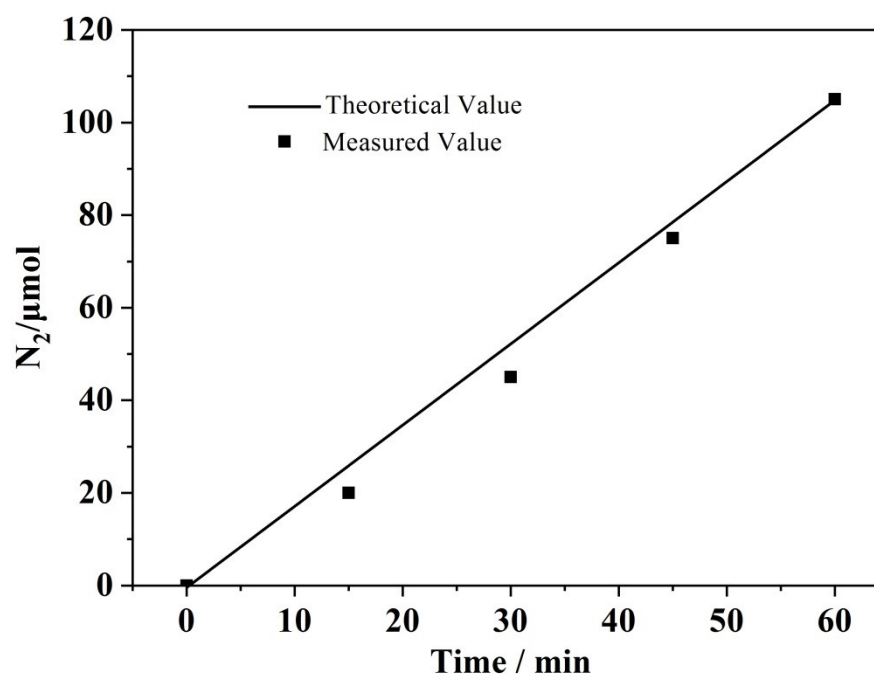

**Fig. S20** Electrocatalytic efficiency of N<sub>2</sub> production over Ni<sub>3</sub>S<sub>2</sub>/Bi<sub>2</sub>S<sub>3</sub>-NiCo LDH/NF.

**Supplementary Table**

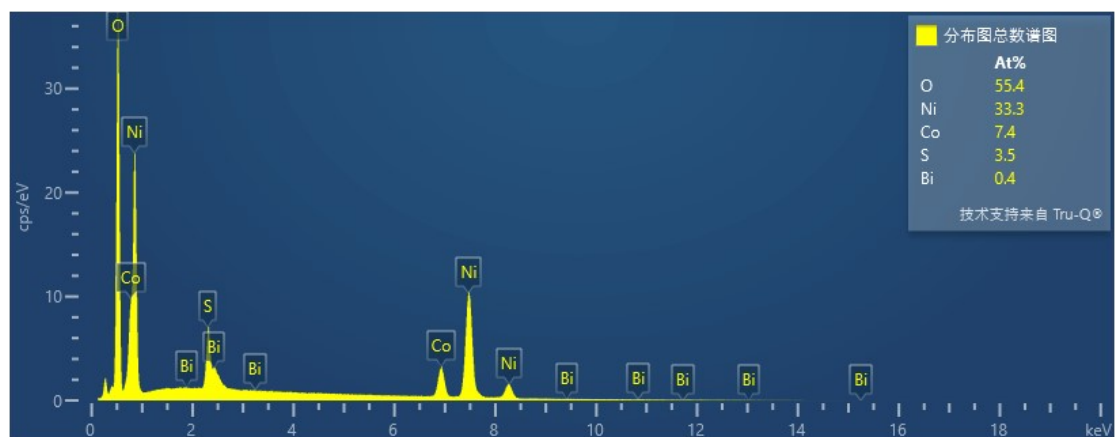

| Element | Mass       | Atomic fraction % |
|---------|------------|-------------------|
|         | fraction % |                   |
| Co      | 4.34       | 5.8               |
| Ni      | 13.22      | 20.91             |
| O       | 63.38      | 51.32             |
| S       | 2.55       | 2.66              |
| Bi      | 0.13       | 0.12              |
| C       | 16.38      | 19.19             |

[1] H.J. Zhang, X.P. Li, A. Hahnel, V. Naumann, C. Lin, S. Azimi, S.L. Schweizer, A.W. Maijenburg, R.B. Wehrspohn, Bifunctional Heterostructure Assembly of NiFe LDH Nanosheets on NiCoP Nanowires for Highly Efficient and Stable Overall Water Splitting;Adv. Funct. Mater., 2018;28.

- [2] J.M. Huo, Y. Wang, L.T. Yan, Y.Y. Xue, S.N. Li, M.C. Hu, Y.C. Jiang, Q.G. Zhai, In situ semi-transformation from heterometallic MOFs to Fe-Ni LDH/MOF hierarchical architectures for boosted oxygen evolution reaction; *Nanoscale*, 2020;12: 14514-23.
- [3] F.F. Yuan, Z.H. Liu, G.X. Qin, Y.H. Ni, Fe-Doped Co-Mo-S microtube: a highly efficient bifunctional electrocatalyst for overall water splitting in alkaline solution; *Dalton Transactions*, 2020;49: 15009-22.
- [4] R. Zhang, R.L. Zhu, Y. Li, Z. Hui, Y.Y. Song, Y.L. Cheng, J.J. Lu, CoP and Ni<sub>2</sub>P implanted in a hollow porous N-doped carbon polyhedron for pH universal hydrogen evolution reaction and alkaline overall water splitting; *Nanoscale*, 2020;12: 23851-8.
- [5] H. Zhao, M. Jiang, Q. Kang, L.Q. Liu, N. Zhang, P.C. Wang, F.M. Zhou, Electrocatalytic oxygen and hydrogen evolution reactions at Ni<sub>3</sub>B/Fe<sub>2</sub>O<sub>3</sub> nanotube arrays under visible light radiation; *Catal. Sci. Technol.*, 2020;10: 8305-13.
- [6] F.C. Wu, G. Ou, J. Yang, H.N. Li, Y.X. Gao, F.M. Chen, Y. Wang, Y.M. Shi, Bifunctional nickel oxide-based nanosheets for highly efficient overall urea splitting; *Chem. Commun.*, 2019;55: 6555-8.
- [7] L. Yan, Y.L. Sun, E.L. Hu, J.Q. Ning, Y.J. Zhong, Z.Y. Zhang, Y. Hu, Facile in-situ growth of Ni<sub>2</sub>P/Fe<sub>2</sub>P nanohybrids on Ni foam for highly efficient urea electrolysis; *J. Colloid. Interf. Sci.*, 2019;541: 279-86.
- [8] C.Y. Zhang, T.T. Chen, H. Zhang, Z.H. Li, J.C. Hao, Hydrated-Metal-Halide-Based Deep-Eutectic-Solvent-Mediated NiFe Layered Double Hydroxide: An Excellent Electrocatalyst for Urea Electrolysis and Water Splitting; *Chem-Asian. J.*, 2019;14: 2995-3002.
- [9] H.Z. Xu, K. Ye, K. Zhu, J.L. Yin, J. Yan, G.L. Wang, D.X. Cao, Template-directed assembly of urchin-like CoS<sub>x</sub>/Co-MOF as an efficient bifunctional electrocatalyst for overall water and urea electrolysis; *Inorg. Chem. Front.*, 2020;7: 2602-10.
- [10] Q. Li, W.X. Zhang, J. Shen, X.Y. Zhang, Z. Liu, J.Q. Liu, Trimetallic nanoplate arrays of Ni-Fe-Mo sulfide on FeNi<sub>3</sub> foam: A highly efficient and bifunctional electrocatalyst for overall water splitting; *J. Alloy. Compd.*, 2022;902.
